# Supplementary material for: Membranes prime the RapGEF EPAC1 to transduce cAMP signaling
Source: Research Square preprint supplement (doi:10.21203/rs.3.rs-2608569/v1), 2023-03-06
Supplement: Supplementary file 1 [file 4fe183c97d06b2c5fead5f2b.docx]

**Table S1. EPAC1DEP-CNB : Crystallographic data collection and refinement statistics.**

|  |  |
| --- | --- |
| **Data collection** |  |
| Space group | I121 |
| Cell dimensions |  |
| *a*, *b*, *c* (Å) | 41.70 105.02 160 .56 |
|  () | 90.00 90.04 90.00 |
| Resolution (Å) | 88.24–2,30  (2.39–2.30) |
| *R*merge | 0.136 (0.900) |
| *I* / *I* | 9.4 (1.95) |
| Completeness (%) | 99.4 (98.9) |
| Redundancy | 6.7 (6.8) |
| **Refinement** |  |
| Resolution (Å) | 2.3 |
| No. reflections | 180358 |
| *R*work / *R*free | 0.195/0,237 |
| No. atoms | 4133 |
| Protein | 3949 |
| Water | 135 |
| *B*-factors | 37.1 |
| **R.m.s. deviations** |  |
| Bond lengths (Å) | 0.006 |
| Bond angles (°) | 0.877 |

**Table S2. EPAC1-CNB-GEF : SAXS data collection**

| Instrument | SWING beamline, equipped with a PCCD170170 Aviex Detector | | | | | | |
| --- | --- | --- | --- | --- | --- | --- | --- |
| Beam geometry | Pinhole | | | | | | |
| Wavelength (Å) | 1.033 | | | | | | |
| *q* range (Å−1) | 0.01–0.600 | | | | | | |
| Exposure time (s) | 1.5 per frame | | | | | | |
| Temperature (°C) | 15 | | | | | | |
| **Structural Parameters** | | **EPAC1** | **EPAC1-cAMP** | | **EPAC1-CE3F4** | **EPAC1-cAMP-CE3F4** | |
| From Guinier fit | *I*0 (cm−1) | 0.069 ± 5.2e−5 | 0.073 ±4.6e−5 | | 0.07 ± 5.1e−5 | 0.071 ± 9.4e-5 | |
| *R*g (Å) | 31.93 ± 0.09 | 34.91 ± 0.03 | | 32.58 ± 0.06 | 33.41 ± 0.14 | |
| From *P*(r) | *I*0 (cm−1) | 0.068 ± 5.0e−5 | 0.073 ± 1 .4e-5 | | 0.07 ± 5.2e-5 | 0.071 ± 6.4e-5 | |
| *Volume*(Å3) | 131000 | 140000 | | 140000 | 134000 | |
| *R*g (Å) | 31.65 | 35.53 | | 32.86 | 33.84 | |
| *D*max (Å) | 107 | 130 | | 114 | 118 | |
| **Molar Mass Determination** | | | | | | | |
| Molar mass (kDa) from sequence | | **83** | | **83** | **83** | | **83** |
| Molar mass (kDa) from Qp | | 86.9 | | 95.9 | 91.2 | | 85.3 |
| Molecular mass (kDa) from MoW | | 90.3 | | 99.5 | 92.3 | | 91.0 |
| Molecular mass (kDa) from Vc | | 82.7 | | 88.3 | 86.0 | | 84.4 |
